# Supplementary material for: Probiotic and postbiotic strategies against foulbrood in honeybees: in vitro and in vivo insights
Source: Research Square preprint supplement (doi:10.21203/rs.3.rs-6510472/v1), 2025-04-28
Supplement: Supplementary file 1 [file 5fc745d874d85b8e257d191c.docx]

Probiotic and postbiotic strategies against foulbrood in honeybees: in vitro and in vivo insights, Probiotics and Antimicrobial Proteins, Mathien et al, Université Clermont Auvergne, CNRS, Laboratoire Microorganismes : Génome et environnement, F-63000 Clermont-Ferrand, France, hicham.el_alaoui@uca.fr

**Supplementary material**

**2. Materials and Methods**

**Visualization of LAB and CFS effect on *P. larvae* ultrastructure**

*P. larvae exposition to LAB and their CFS*

To investigate the inhibitory action mode of the LAB and their CFS on *P. larvae* and *M. plutonius*, electron microscopy observations were carried out. Overnight cultures of the pathogens and the two LAB were washed twice with PBS and cell concentration adjusted to 108 CFU/mL. Subsequently, a suspension of *P. larvae* or *M. plutonius* was either combined with the CFS (in MYT media) or the LAB suspension in a Krebs Ringer solution (according to Daisley *et al.,* 2020b). The resulting concentration for each bacterium was 107 CFU/mL and 12.5% of CFS. The suspensions were co-incubated for a period of 4h at a temperature of 37°C with an agitation speed of 110 rpm. Following the exposure period, the cultures were subjected to centrifugation at 4000 x g for 5 min, after which they were resuspended in rinsing buffer for 2 min, centrifugated again and resuspended in fixative solution.

*Scanning electron microscopy*

Electron microscopy preparations were all performed by the “Centre d’Imagerie Cellulaire Santé” (Clermont-Ferrand, France). All chemical products were from Electron Microscopy Science, and distributed in France by Delta Microscopies. Bacteria were deposited on polycarbonate filters (0.2µm) and fixed overnight at 4°C with 2.5% glutaraldehyde and paraformaldehyde 2% in 0.2 M sodium cacodylate buffer, pH 7.4. Bacteria were washed in sodium cacodylate buffer (0.2 mol/L, pH 7.4) and post-fixed 1 hour with 1% osmium tetroxide in same buffer. After rinsing for 20 minutes in distilled water, dehydration by graded ethanol was performed from 25° to 100° (10 minutes each) to finish in hexamethyldisilazane (HMDS) for 10 minutes. Filters were mounted on stubs using adhesive carbon tabs and samples were coated with platinum (Quorum Q150 TES, UK). Observations were carried out using a Field Emission Scanning Electron Microscope Regulus 8230 (Hitachi, Japan) at 2kV with a secondary electron detector.
