# Supplementary material for: Probiotic and postbiotic strategies against foulbrood in honeybees: in vitro and in vivo insights
Source: Research Square preprint supplement (doi:10.21203/rs.3.rs-6510472/v1), 2025-04-28
Supplement: Supplementary file 1 [file 12495b886757f41dbb29ac8f.pdf]

Probiotic and postbiotic strategies against foulbrood in honeybees: in vitro and in vivo insights, Probiotics and Antimicrobial Proteins, Mathien et al, Université Clermont Auvergne, CNRS, Laboratoire Microorganismes : Génome et environnement, F-63000 Clermont-Ferrand, France, hicham.el\_alaoui@uca.fr

|                               | Diet A | Diet B | Diet C |
|-------------------------------|--------|--------|--------|
| D-glucose (g)                 | 0,6    | 0,75   | 0,9    |
| D-fructose (g)                | 0,6    | 0,75   | 0,9    |
| Yeast extract (g)             | 0,1    | 0,15   | 0,2    |
| CFS (optional) (mL)           | 0.625  | 0.625  | 0.625  |
| Distilled water (QSP)<br>(mL) | 5      | 5      | 5      |
| Royal Jelly 1:1 (w/w)         | 5      | 5      | 5      |
| Total (mL)                    | 10     | 10     | 10     |

| Day of feeding | Diet | Volume (µL) |
|----------------|------|-------------|
| 1              | A    | 10          |
| 2              | A    | 10          |
| 3              | B    | 20          |
| 4              | C    | 30          |
| 5              | C    | 40          |
| 6              | C    | 50          |

**Supplementary Table S1: Composition and preparation of each diet, and their amount provided to larvae according to their developmental stage.** In accordance with the experimental conditions, CFS was incorporated, and the aqueous solution was prepared and adjusted with distilled water up to 5 mL QSP prior to adding royal jelly in a 1:1 (w/w) ratio.
