# Supplementary material for: Probiotic and postbiotic strategies against foulbrood in honeybees: in vitro and in vivo insights
Source: Research Square preprint supplement (doi:10.21203/rs.3.rs-6510472/v1), 2025-04-28
Supplement: Supplementary file 2 [file 2ad4e48d84876bc73c37c9fc.pdf]

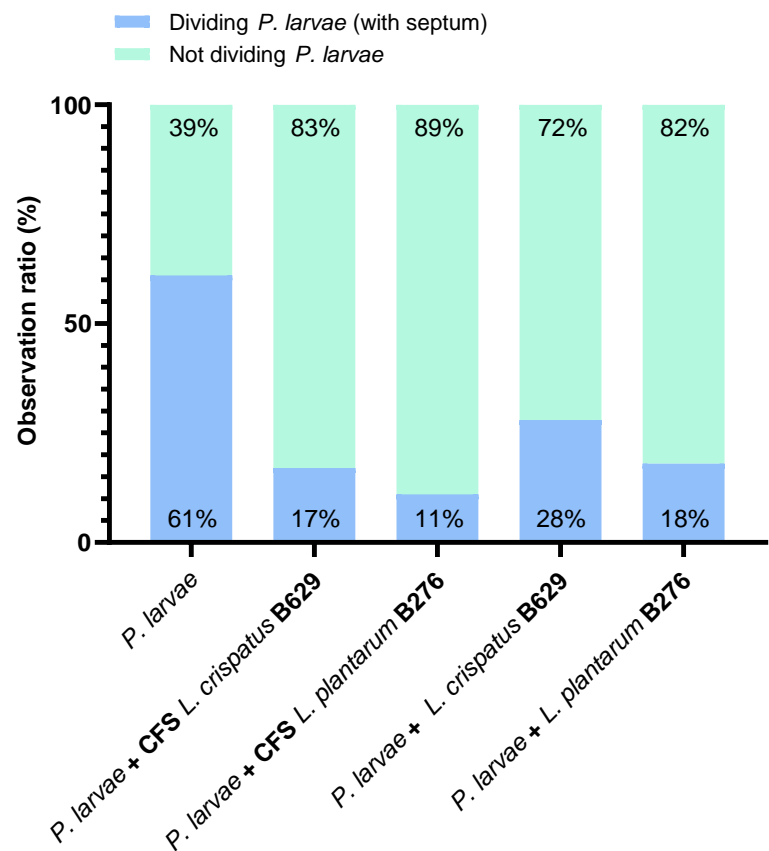

**Supplementary Figure S2: Observation ratios (%) of dividing or non-dividing *P. larvae* cells co-incubated with LAB and or exposed to CFS at 12.5% for 4 hours.** Based on SEM micrographs, *P. larvae* cells were counted exposed to different conditions. The cells exhibiting a septum were classified as "dividing" cells, while those devoid of a septum were designated as "not dividing". The total number of dividing or non-dividing cells was then divided by the total number of cells counted in a given condition.
