# Supplementary material for: Probiotic and postbiotic strategies against foulbrood in honeybees: in vitro and in vivo insights
Source: Research Square preprint supplement (doi:10.21203/rs.3.rs-6510472/v1), 2025-04-28
Supplement: Supplementary file 3 [file 3db1654568a0070da6197cb6.pdf]

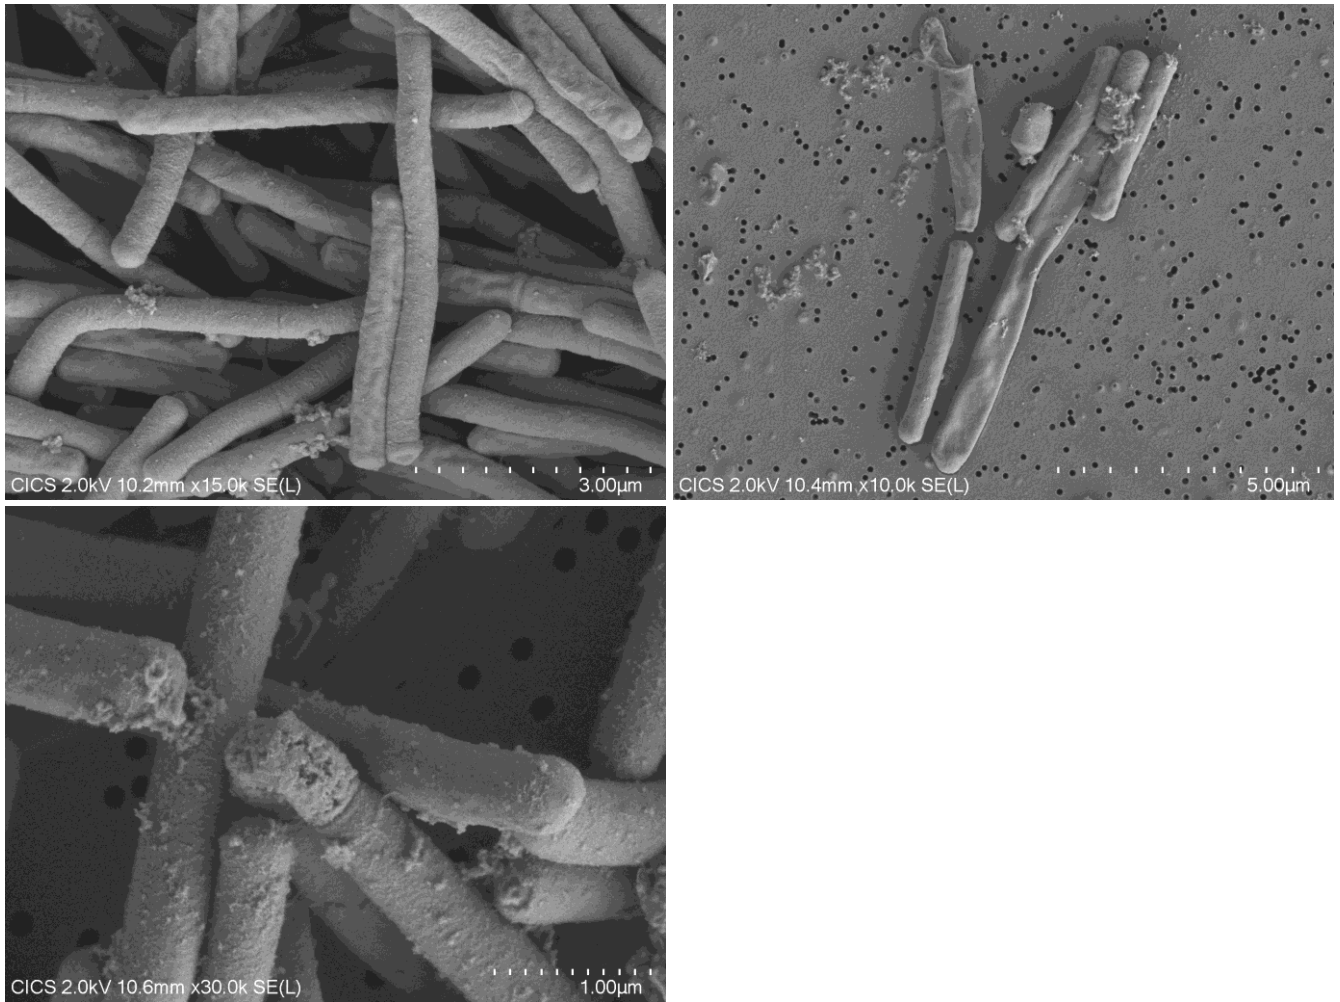

**Supplementary Figure S1: Scanning electron micrographs of *P. larvae* co-incubated with LAB or exposed to CFS at 12.5% for 4-hours.** Scarce electron microscopy observations revealing (A) untreated *P. larvae* long rod-shaped cells, (B) *P. larvae* cells co-incubated with *L. plantarum* cells, displaying emptied and less turgid *P. larvae* cells, (C) porous surface of *P. larvae* exposed with *L. crispatus* CFS.
